# Supplementary material for: Rare prenylated isoflavonoids from the young twigs of Millettia extensa and their cytotoxic activities
Source: Royal Society of Chemistry journal article supplement (doi:10.1039/d2ra05950a), 2022-01-01
Supplement: d2ra05950a1.pdf [file d2ra05950a1.pdf]

## Supplementary Information

Rare prenylated isoflavonoids from the young twigs of *Millettia extensa* and their cytotoxic activities

Sarot Cheenpracha<sup>a,\*</sup>, Ratchanaporn Chokchaisiri<sup>a</sup>, Surat Laphookhieo<sup>b,c</sup>, Thunwadee Limtharakul<sup>d</sup>, Chutamas Thepmalee<sup>e</sup>

<sup>a</sup> *Division of Chemistry, School of Science, University of Phayao, Phayao 56000, Thailand*

<sup>b</sup> *Center of Chemical Innovation for Sustainability (CIS) and School of Science, Mae Fah Luang University, Chiang Rai 57100, Thailand*

<sup>c</sup> *Medicinal Plants Innovation Center of Mae Fah Luang University, Chiang Rai 57100, Thailand*

<sup>d</sup> *Department of Chemistry and Center of Excellence for Innovation in Chemistry, Faculty of Science, the Graduate School and Research Center on Chemistry for Development of Health Promoting Products from Northern Resources, Chiang Mai University, Chiang Mai 50200, Thailand*

<sup>e</sup> *Division of Biochemistry, School of Medical Sciences, University of Phayao, Phayao 56000, Thailand*

---

\*Corresponding author

*E-mail address:* cheenpracha@gmail.com [or](mailto:sarot.ch@up.ac.th) sarot.ch@up.ac.th ([S. Cheenpracha](mailto:S.Cheenpracha)).

## Contents

|                   | Page                                                                                                          |    |
|-------------------|---------------------------------------------------------------------------------------------------------------|----|
| <b>Figure S1</b>  | HRESIMS ion peak of Millexatin N ( <b>1</b> )                                                                 | 3  |
| <b>Figure S2</b>  | <sup>1</sup> H NMR (500 MHz) Spectrum of Millexatin N ( <b>1</b> ) in CDCl <sub>3</sub>                       | 4  |
| <b>Figure S3</b>  | <sup>13</sup> C NMR (125 MHz) Spectrum of Millexatin N ( <b>1</b> ) in CDCl <sub>3</sub>                      | 4  |
| <b>Figure S4</b>  | <sup>1</sup> H- <sup>1</sup> H COSY Spectrum of Millexatin N ( <b>1</b> )                                     | 5  |
| <b>Figure S5</b>  | HSQC Spectrum of Millexatin N ( <b>1</b> )                                                                    | 5  |
| <b>Figure S6</b>  | HMBC Spectrum of Millexatin N ( <b>1</b> )                                                                    | 6  |
| <b>Figure S7</b>  | NOESY Spectrum of Millexatin N ( <b>1</b> )                                                                   | 6  |
| <b>Figure S8</b>  | HRESIMS ion peak of Millexatin O ( <b>2</b> )                                                                 | 7  |
| <b>Figure S9</b>  | <sup>1</sup> H NMR (500 MHz) Spectrum of Millexatin O ( <b>2</b> ) in CDCl <sub>3</sub>                       | 8  |
| <b>Figure S10</b> | <sup>13</sup> C NMR (125 MHz) Spectrum of Millexatin O ( <b>2</b> ) in CDCl <sub>3</sub>                      | 8  |
| <b>Figure S11</b> | DEPT135 Spectrum of Millexatin O ( <b>2</b> )                                                                 | 9  |
| <b>Figure S12</b> | <sup>1</sup> H- <sup>1</sup> H COSY Spectrum of Millexatin O ( <b>2</b> )                                     | 9  |
| <b>Figure S13</b> | HSQC Spectrum of Millexatin O ( <b>2</b> )                                                                    | 10 |
| <b>Figure S14</b> | HMBC Spectrum of Millexatin O ( <b>2</b> )                                                                    | 10 |
| <b>Figure S15</b> | NOESY Spectrum of Millexatin O ( <b>2</b> )                                                                   | 11 |
| <b>Figure S16</b> | HRESIMS ion peak of Millexatin P ( <b>3</b> )                                                                 | 12 |
| <b>Figure S17</b> | <sup>1</sup> H NMR (500 MHz) Spectrum of Millexatin P ( <b>3</b> ) in CDCl <sub>3</sub>                       | 13 |
| <b>Figure S18</b> | <sup>13</sup> C NMR (125 MHz) Spectrum of Millexatin P ( <b>3</b> ) in CDCl <sub>3</sub>                      | 13 |
| <b>Figure S19</b> | DEPT135 Spectrum of Millexatin P                                                                              | 14 |
| <b>Figure S20</b> | <sup>1</sup> H- <sup>1</sup> H COSY Spectrum of Millexatin P ( <b>3</b> )                                     | 14 |
| <b>Figure S21</b> | HSQC Spectrum of Millexatin P ( <b>3</b> )                                                                    | 15 |
| <b>Figure S22</b> | HMBC Spectrum of Millexatin P ( <b>3</b> )                                                                    | 15 |
| <b>Figure S23</b> | NOESY Spectrum of Millexatin P ( <b>3</b> )                                                                   | 16 |
| <b>Figure S24</b> | <sup>1</sup> H NMR (500 MHz) Spectrum of Millexatin F ( <b>4</b> ) in CDCl <sub>3</sub>                       | 16 |
| <b>Figure S25</b> | <sup>1</sup> H NMR (500 MHz) Spectrum of Millexatin F ( <b>5</b> ) in CDCl <sub>3</sub>                       | 17 |
| <b>Figure S26</b> | <sup>1</sup> H NMR (500 MHz) Spectrum of Scandenone ( <b>6</b> ) in CDCl <sub>3</sub>                         | 17 |
| <b>Figure S27</b> | <sup>1</sup> H NMR (500 MHz) Spectrum of 2'-Deoxyisoauriculatin ( <b>7</b> ) in CDCl <sub>3</sub>             | 18 |
| <b>Figure S28</b> | <sup>1</sup> H NMR (500 MHz) Spectrum of Auriculatin ( <b>8</b> ) in CDCl <sub>3</sub>                        | 18 |
| <b>Figure S29</b> | <sup>1</sup> H NMR (500 MHz) Spectrum of 7,4'-di- <i>O</i> -prenylgenistein ( <b>9</b> ) in CDCl <sub>3</sub> | 19 |
| <b>Figure S30</b> | <sup>1</sup> H NMR (500 MHz) Spectrum of 3'-Methylorobol ( <b>10</b> ) in Acetone- <i>d</i> <sub>6</sub>      | 19 |

**Data Filename** MET01\_474\_2406\_POS.d      **Sample Name** MET01\_474\_2406\_POS  
**Sample Type** Sample      **Position** P1-D2  
**Instrument Name** Instrument 1      **User Name**  
**Acq Method** POS\_PURE\_10012022\_B\_Tuning.m      **Acquired Time** 17/1/2565 13:59:07 (UTC+07:00)  
**IRM Calibration Status** Success      **DA Method** Default.m  
**Comment** C30H34O5

**Sample Group**  
**Stream Name** LC 1      **Info.**  
**Acquisition Time (Local)** 17/1/2565 13:59:07 (UTC+07:00)  
**Acquisition SW Version** 6200 series TOF/6500 series Q-TOF B.08.00      **QTOF Driver Version** 8.00.00  
**QTOF Firmware Version** 25.712      **Tune Mass Range Max.** 3200

### Spectra

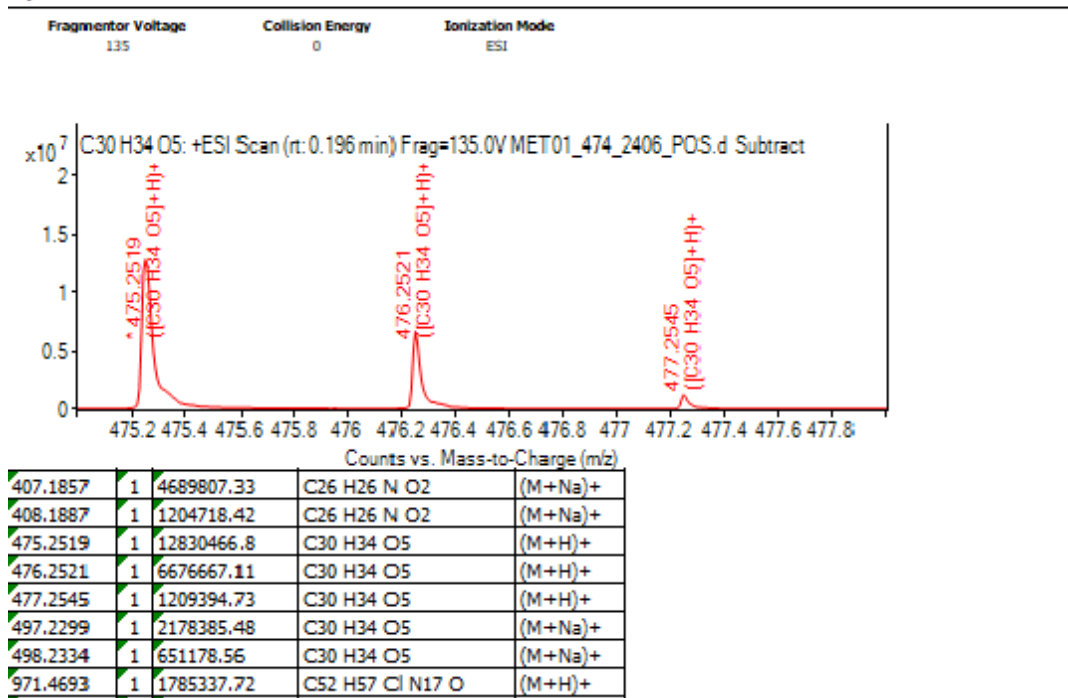

Figure S1. HRESIMS ion peak of Compound 1

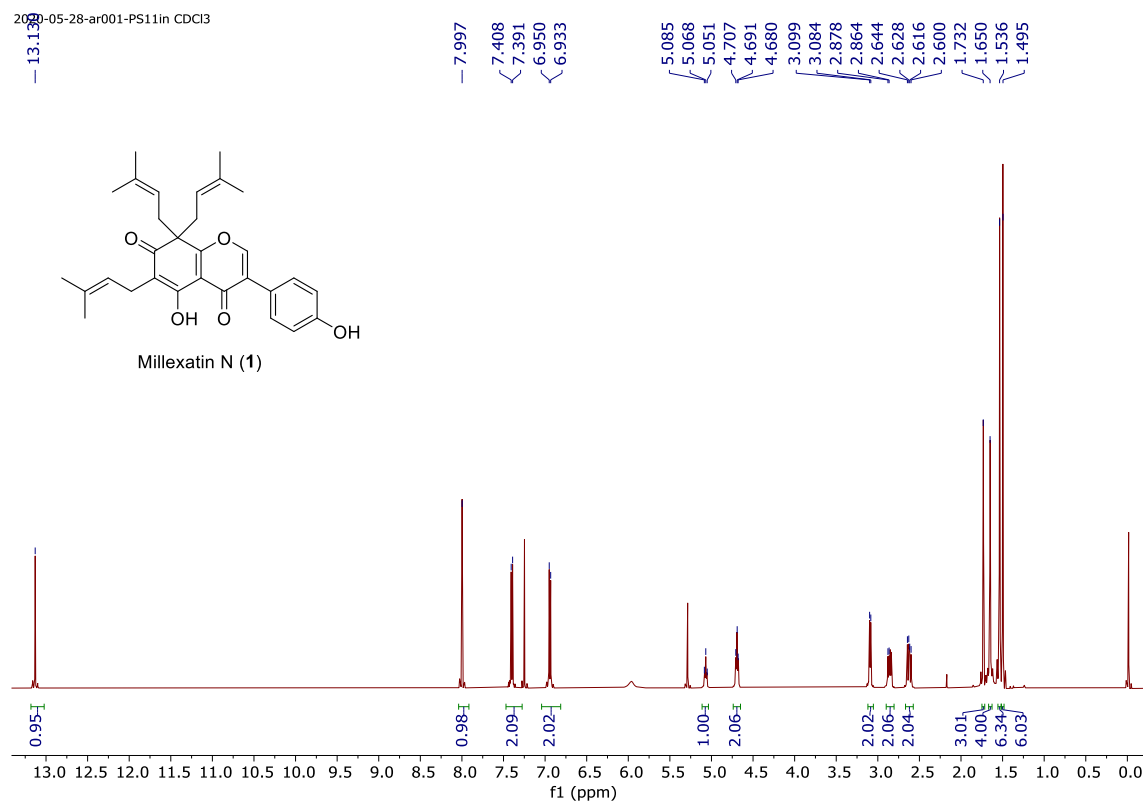

**Figure S2.** <sup>1</sup>H NMR (500 MHz) Spectrum of Millexatin N (1) in CDCl<sub>3</sub>

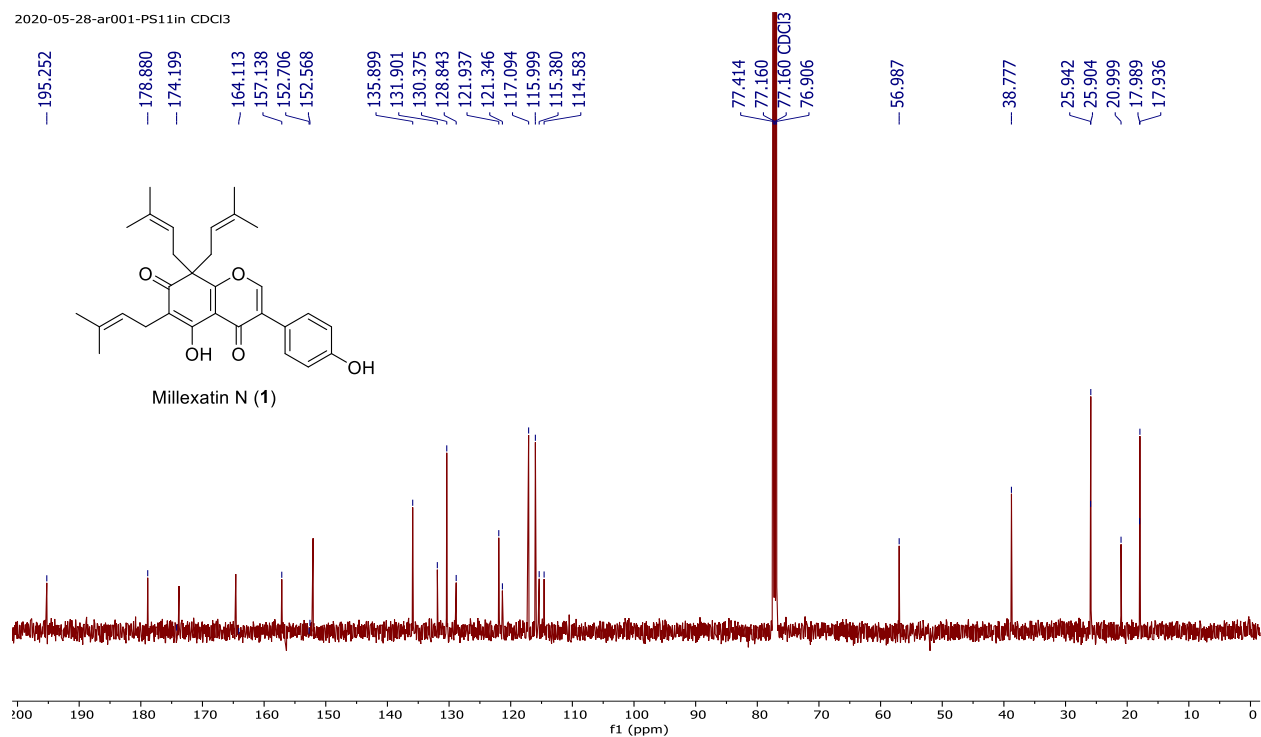

**Figure S3.** <sup>13</sup>C NMR (125 MHz) Spectrum of Millexatin N (1) in CDCl<sub>3</sub>

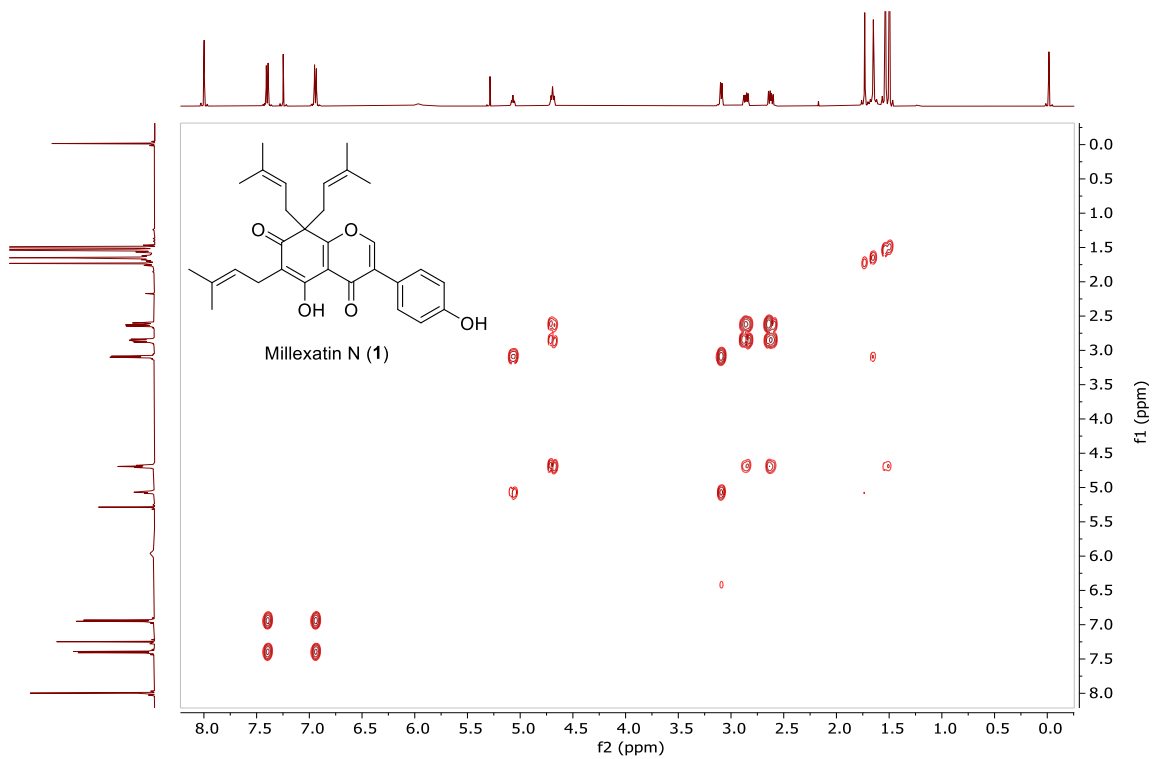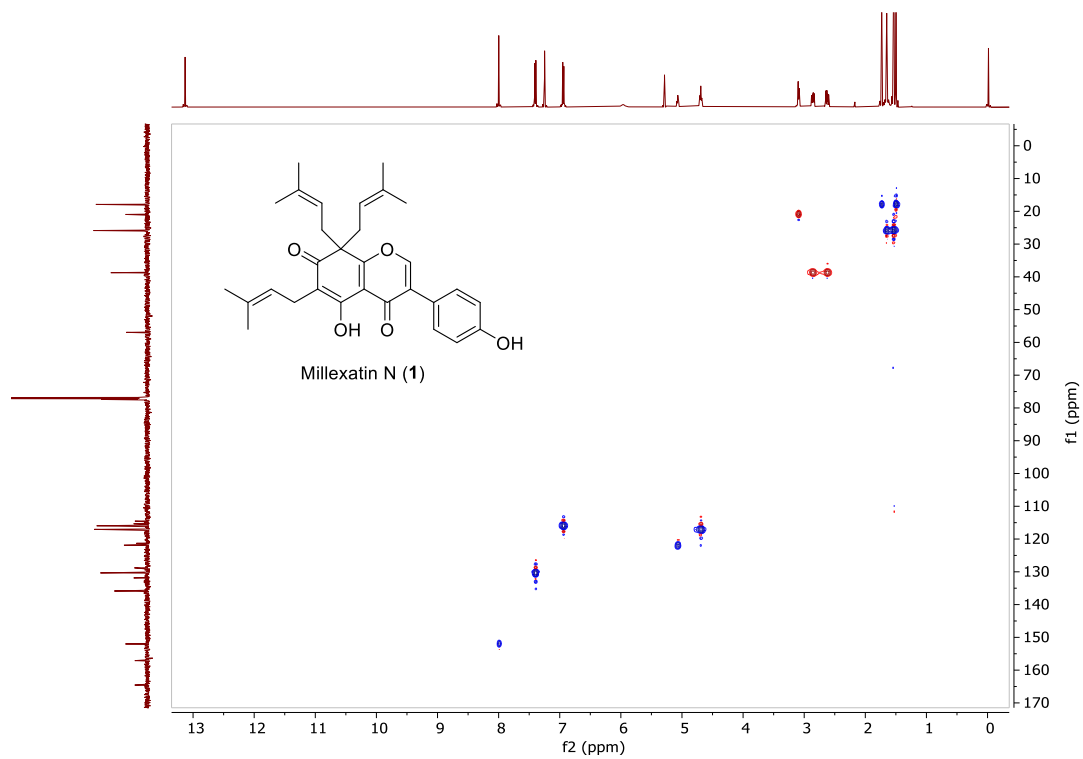

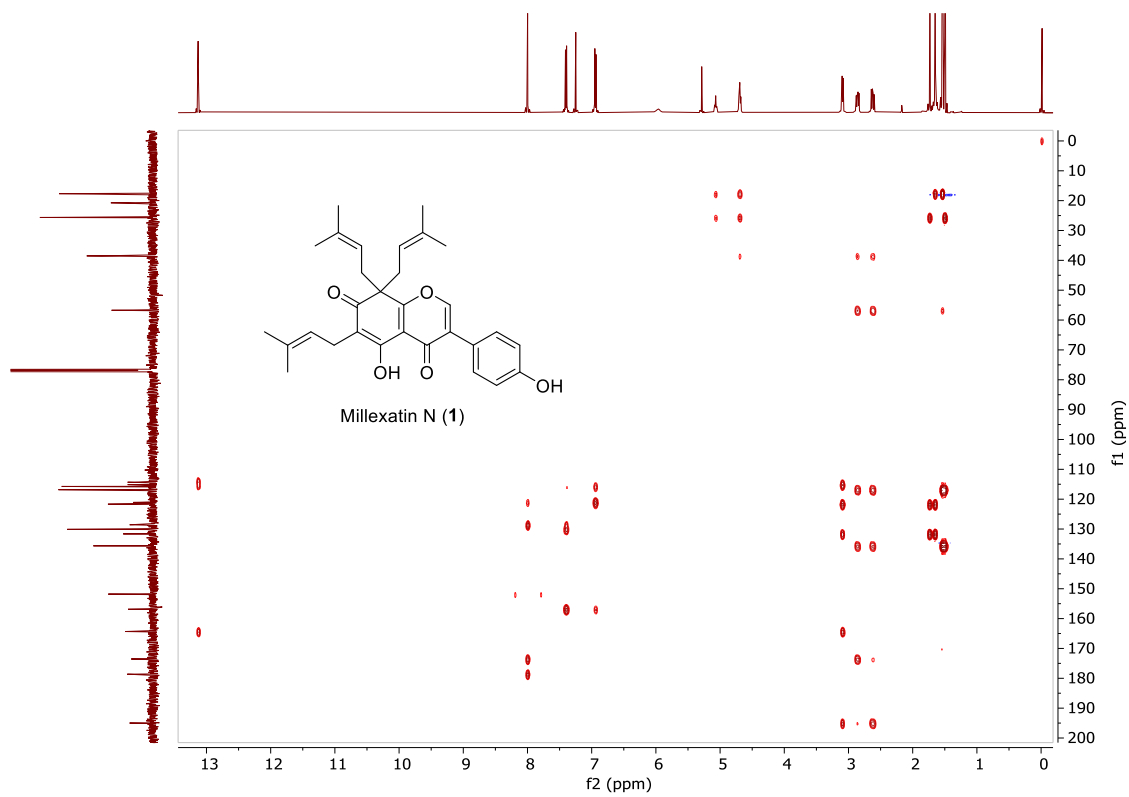

**Figure S6.** HMBC Spectrum of Millexatin N (1)

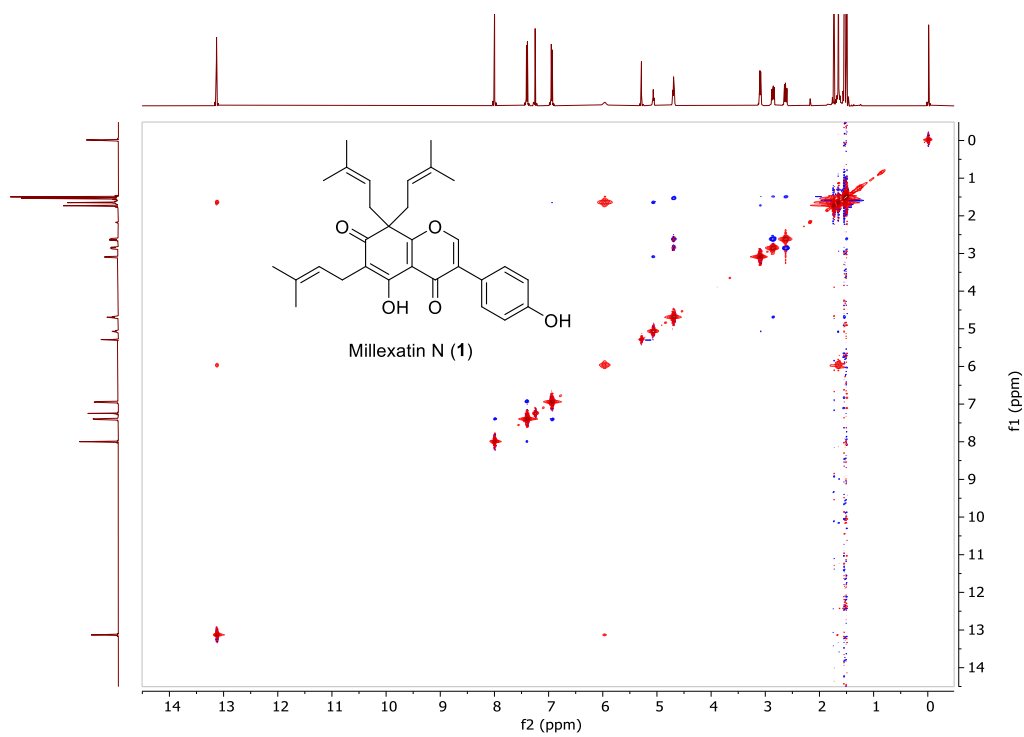

**Figure S7.** NOESY Spectrum of Millexatin N (1)

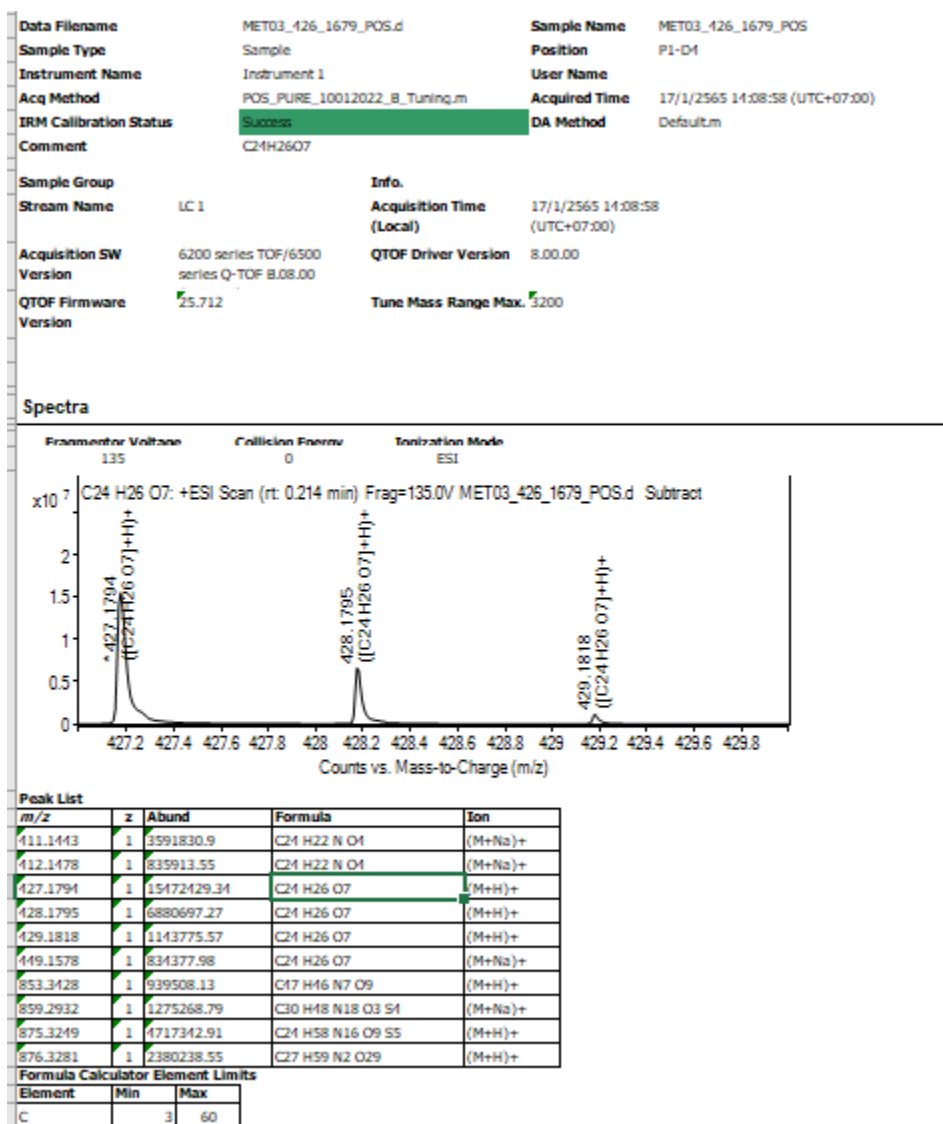

Figure S8. HRESIMS ion peak of Millexatin O (2)

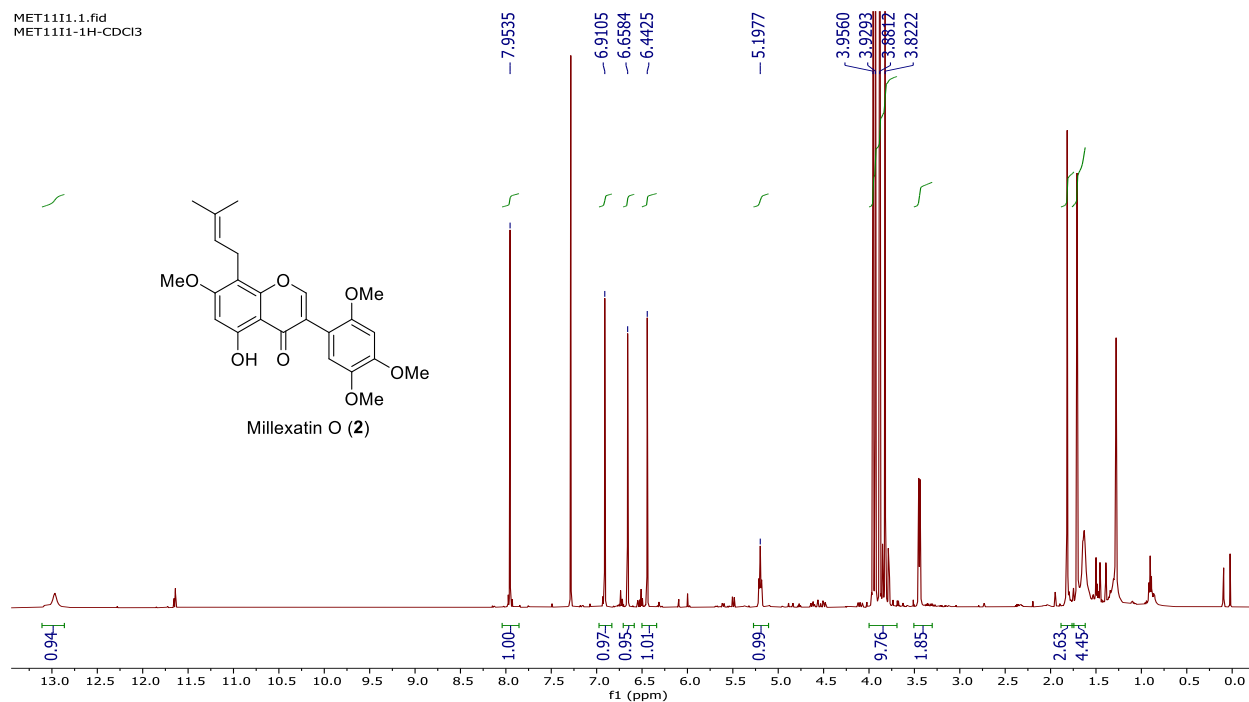

Figure S9. <sup>1</sup>H NMR (500 MHz) Spectrum of Millexatin O (2) in CDCl<sub>3</sub>

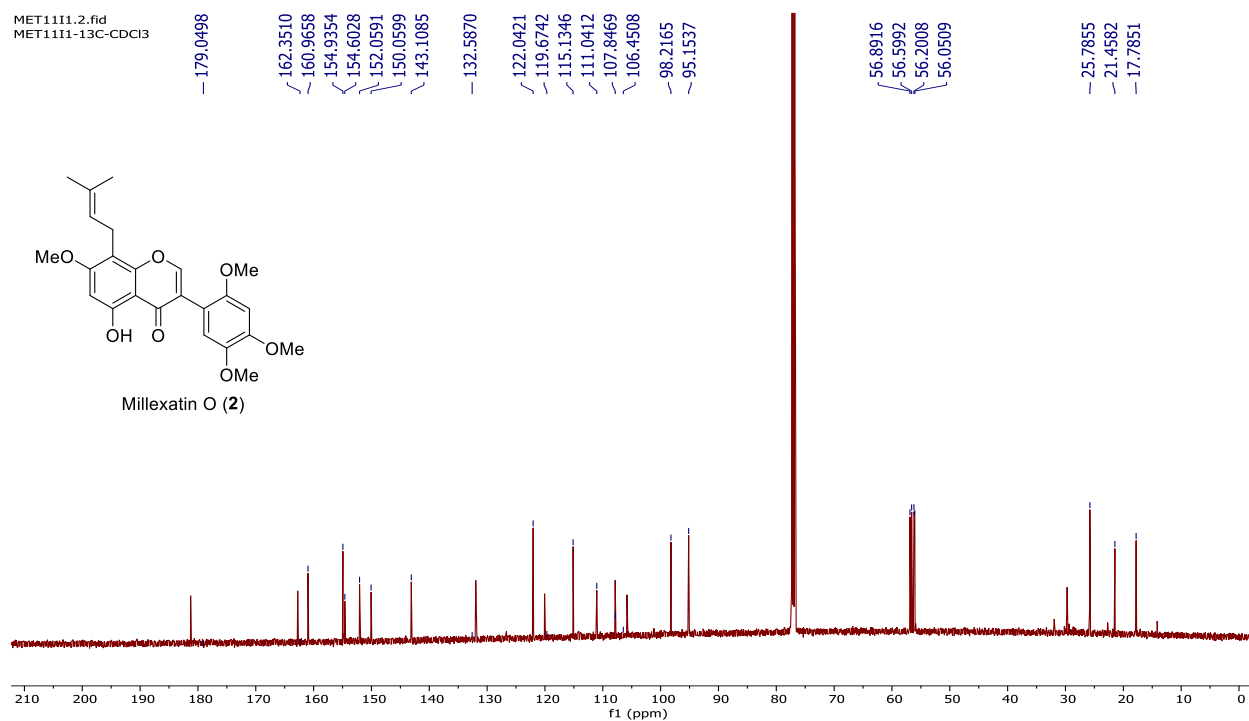

Figure S10. <sup>13</sup>C NMR (125 MHz) Spectrum of Millexatin O (2) in CDCl<sub>3</sub>



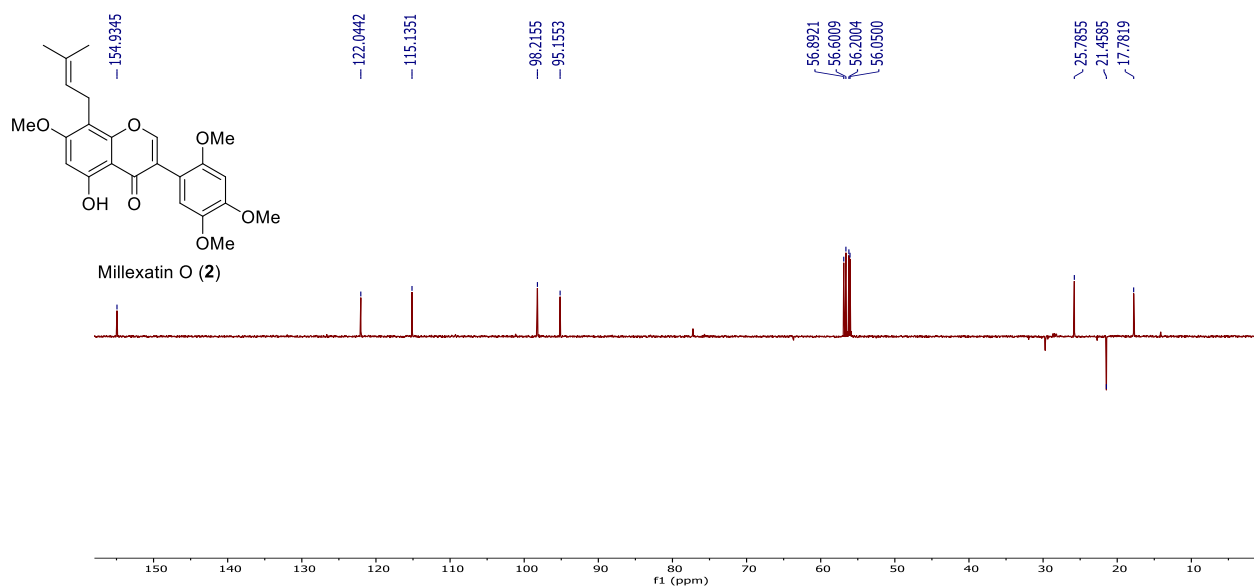

Figure S11. DEPT135 (125 MHz) Spectrum of Millexatin O (2)

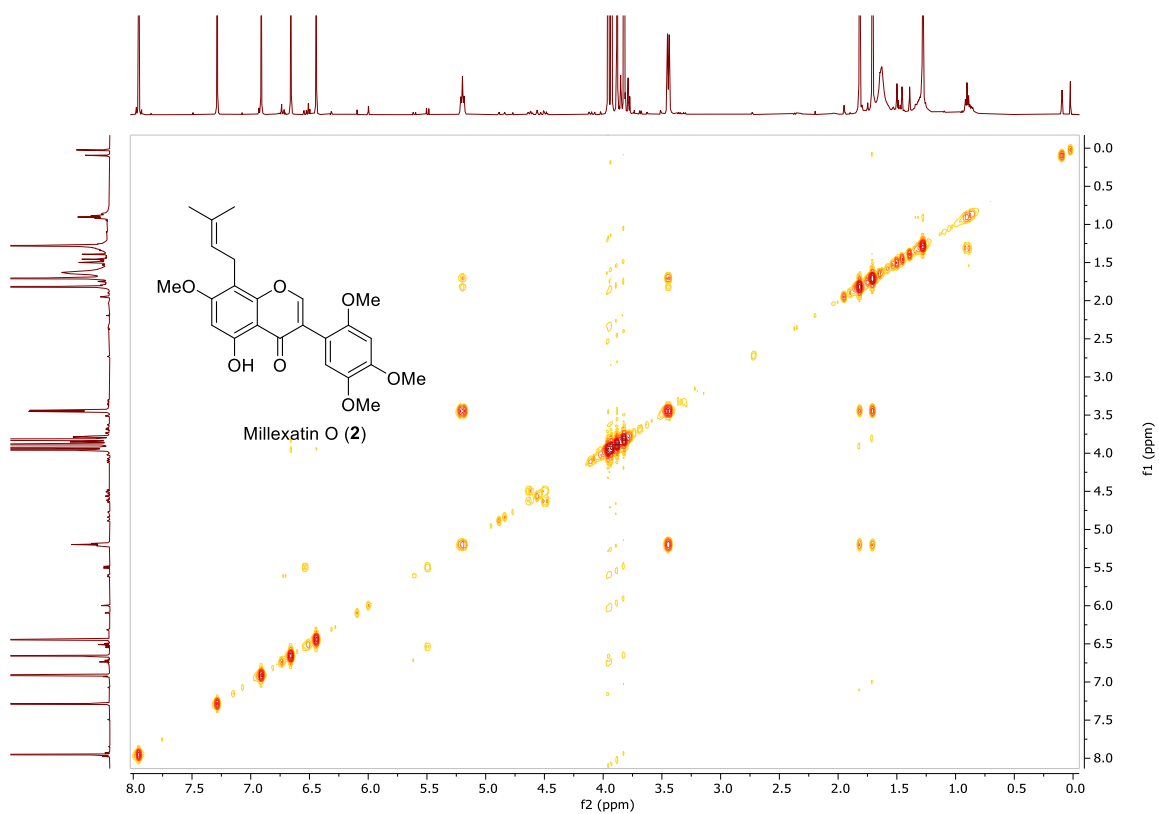

Figure S12.  $^1\text{H}$ - $^1\text{H}$  COSY Spectrum of Millexatin O (2)

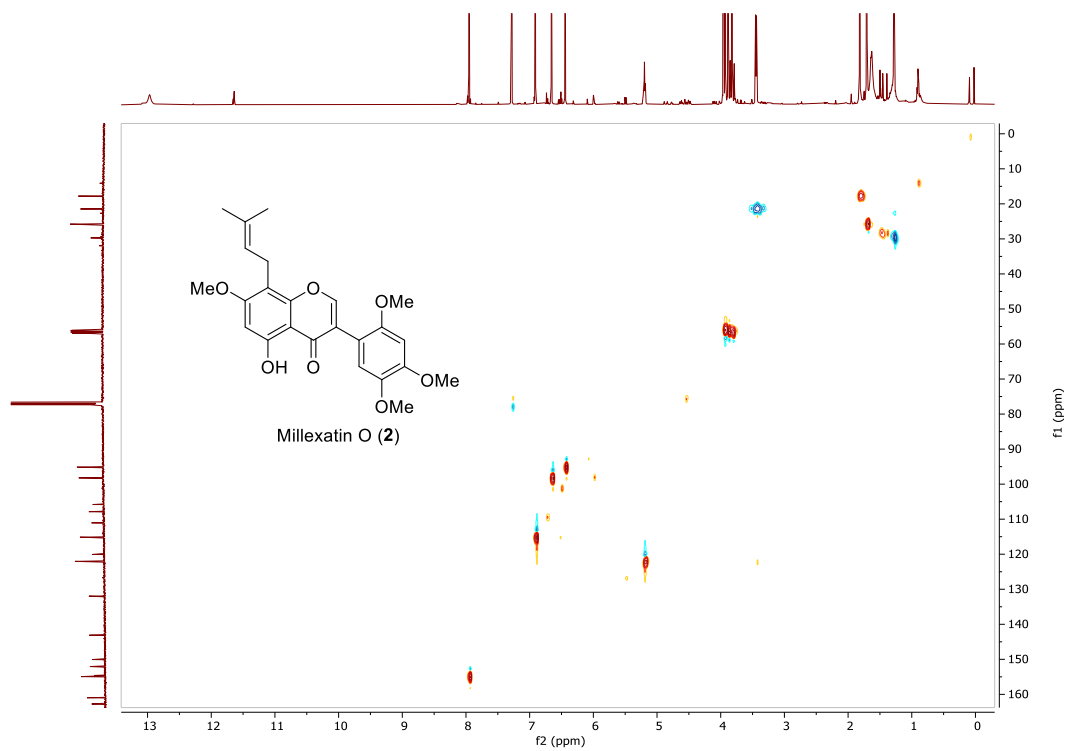

Figure S13. HSQC Spectrum of Millexatin O (2)

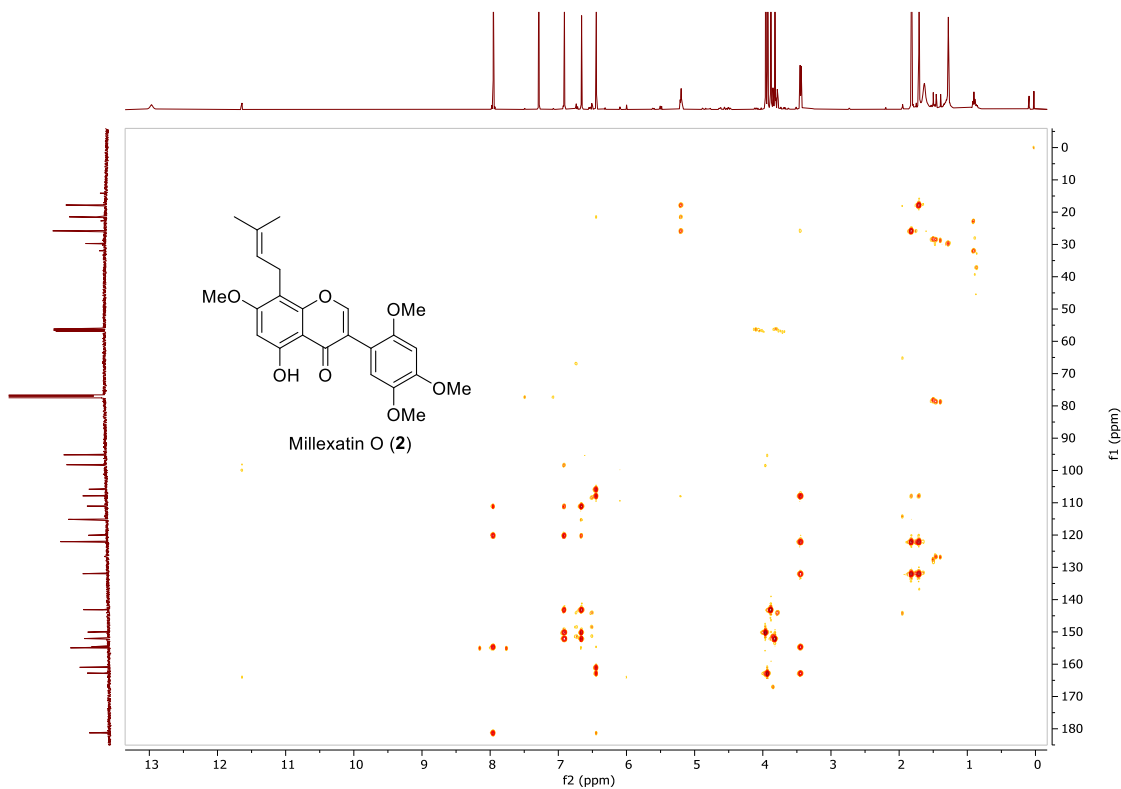

Figure S14. HMBC Spectrum of Millexatin O (2)

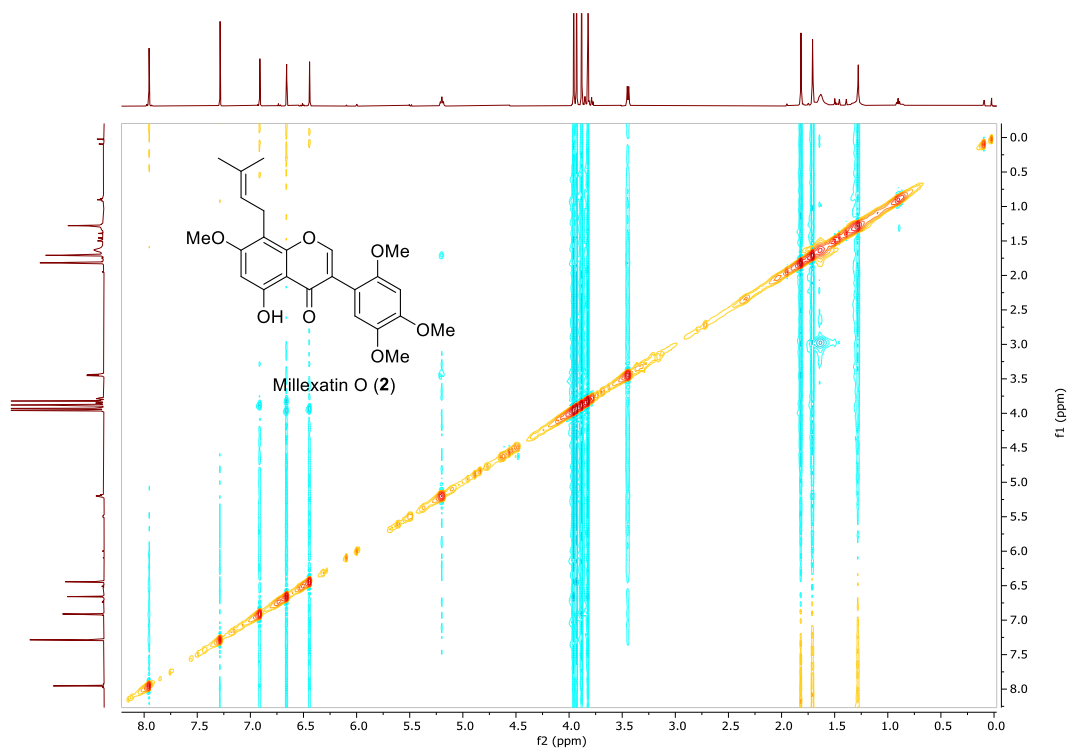

**Figure S15.** NOESY Spectrum of Millexatin O (2)

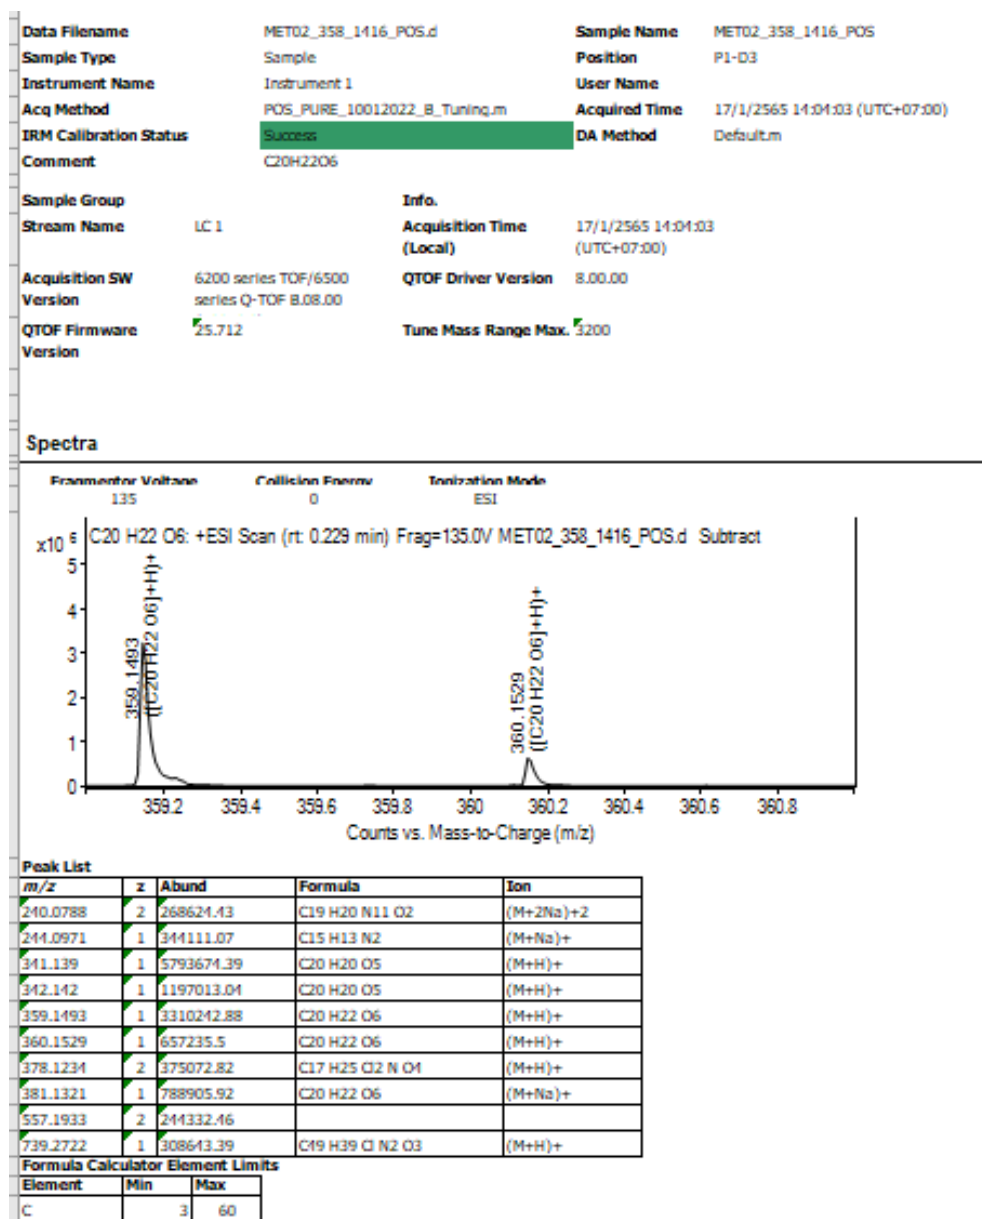

Figure S16. HRESIMS ion peak of Millexatin P (3)

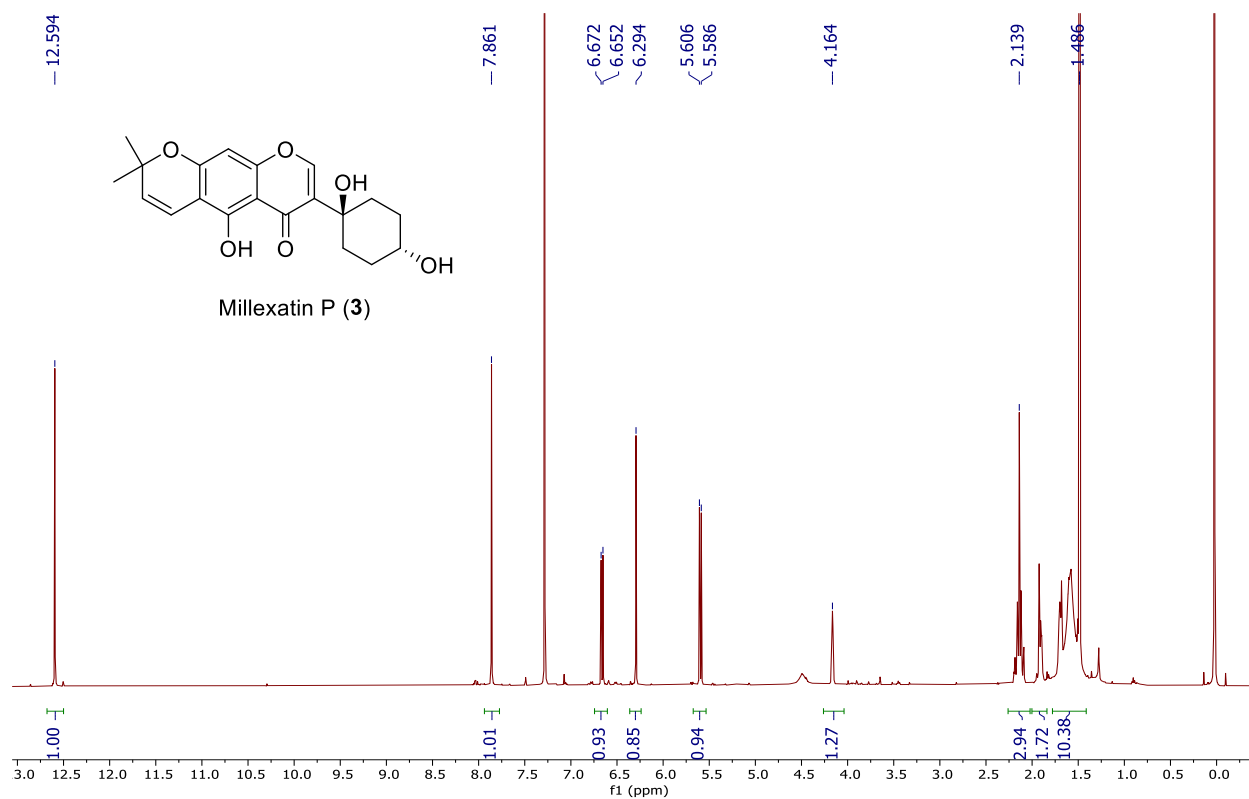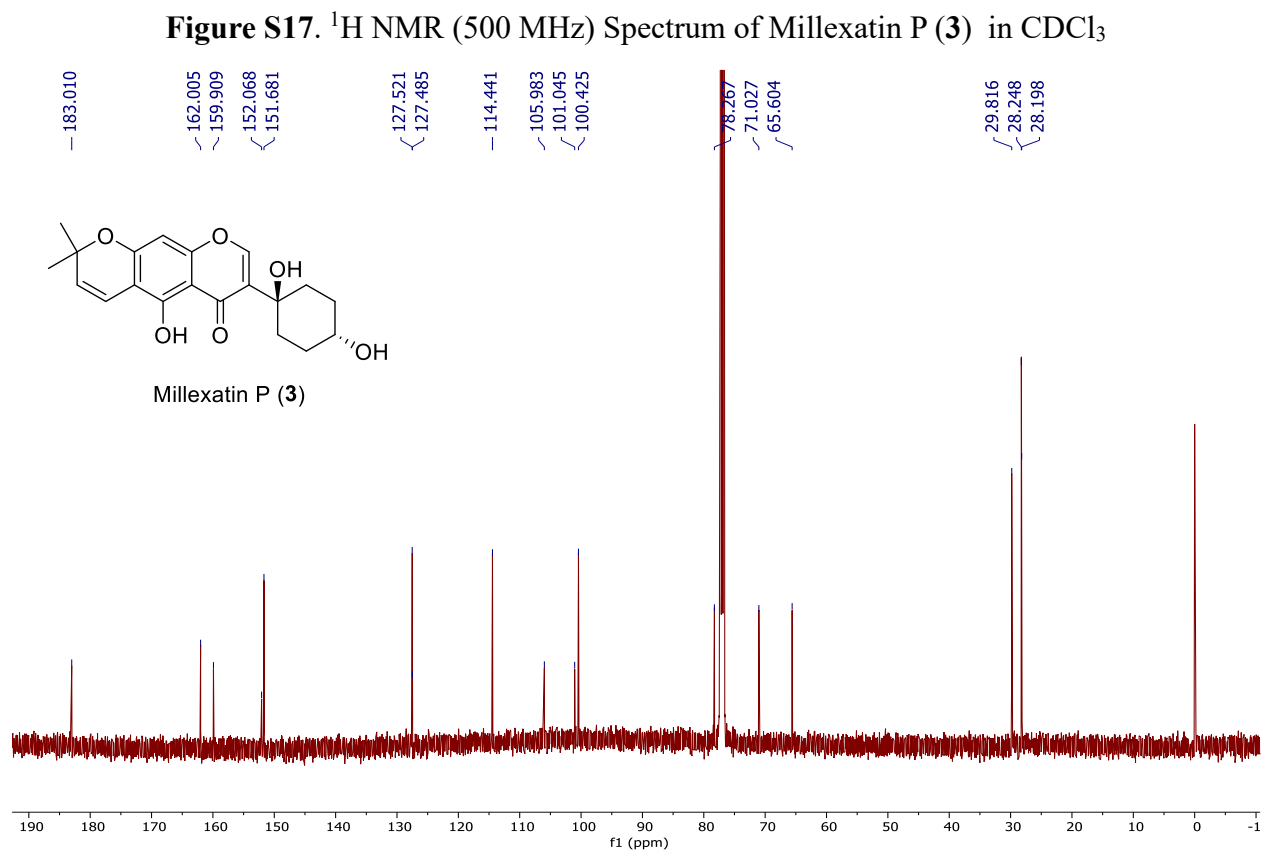

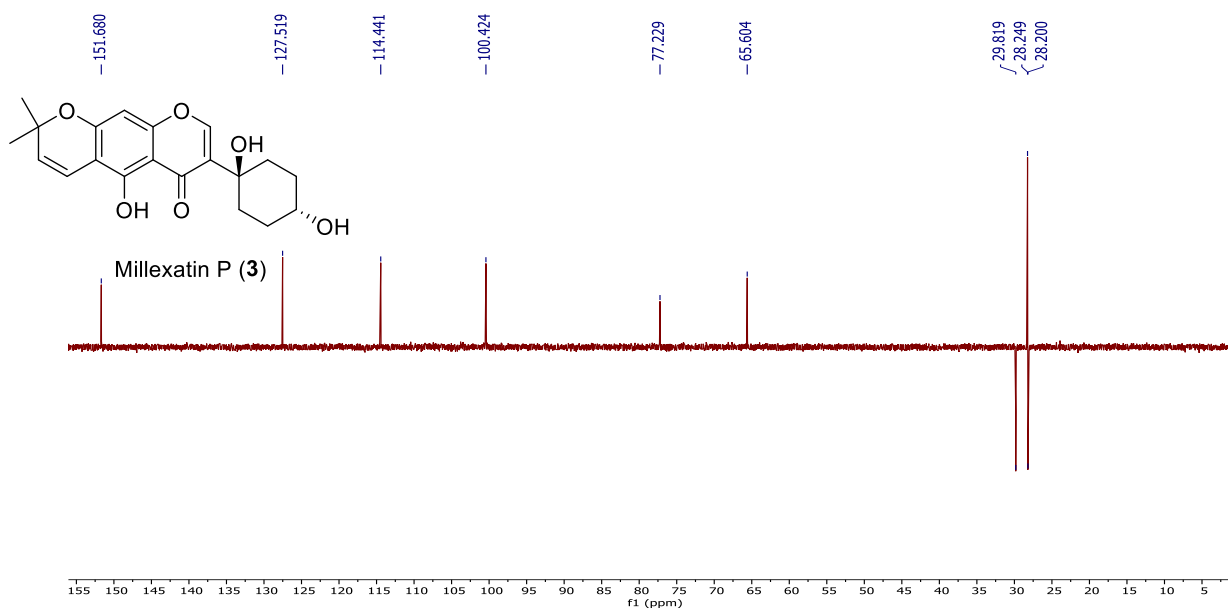

Figure S19. DEPT135 Spectrum of Millexatin P (3)

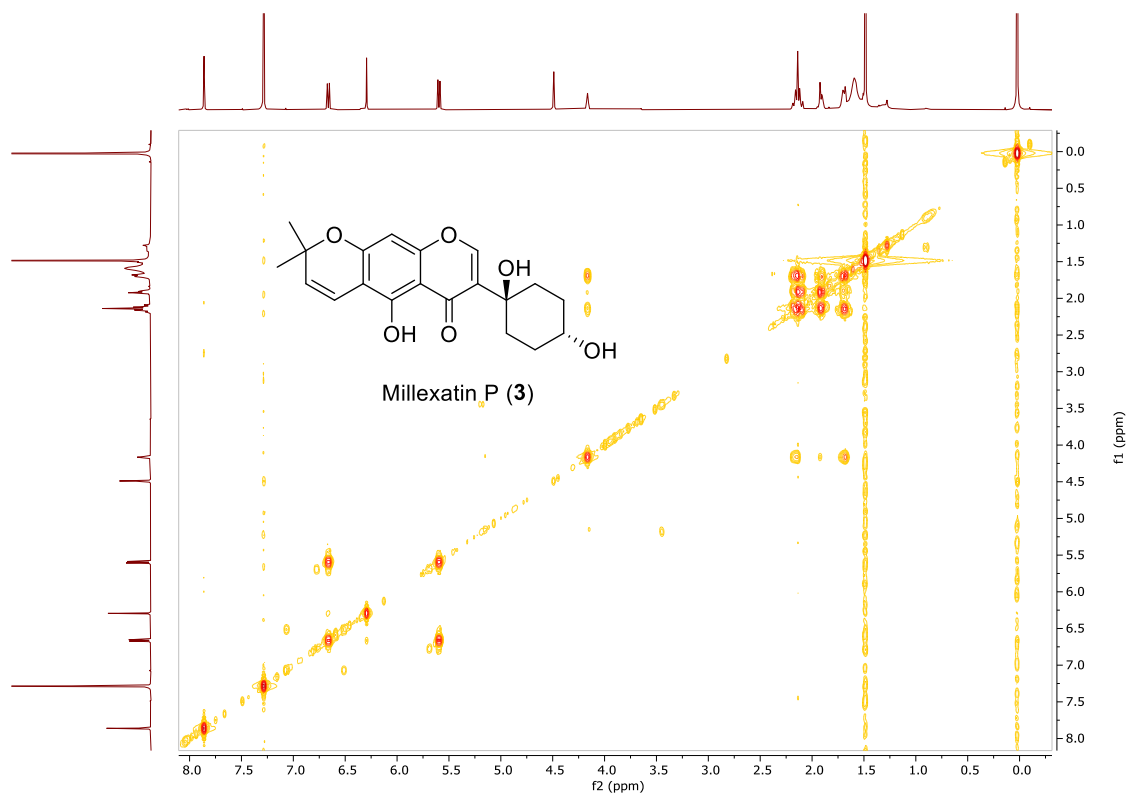

Figure S20.  $^1\text{H}$ - $^1\text{H}$  COSY Spectrum of Millexatin P (3)

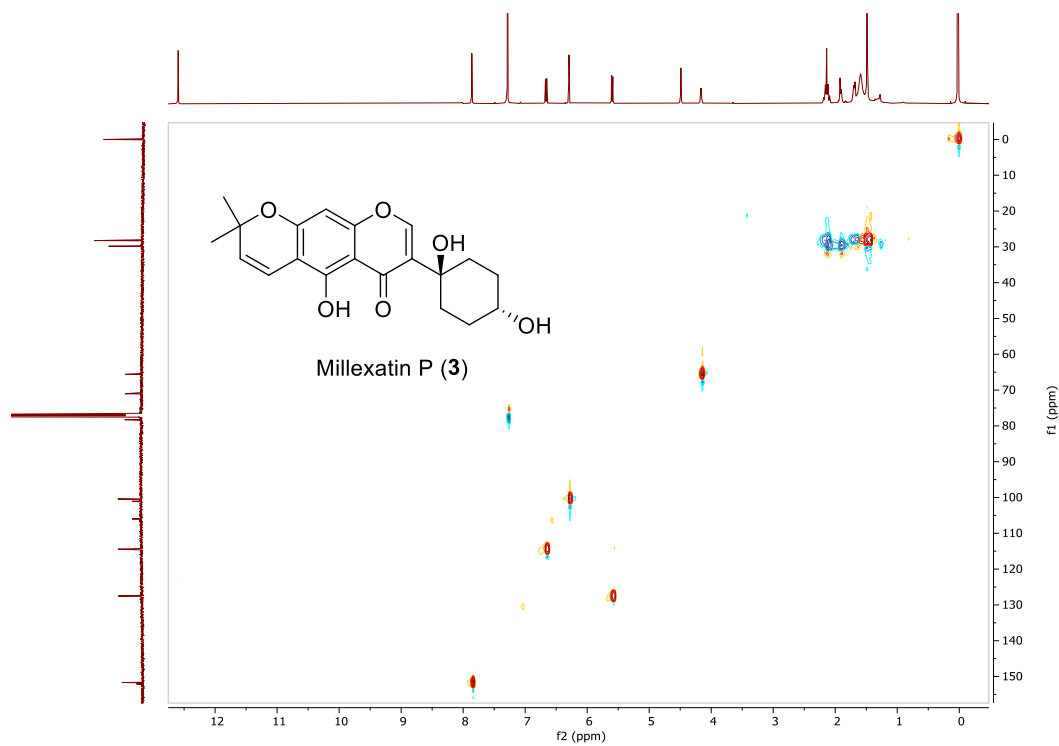

**Figure S21.** HSQC Spectrum of Millexatin P (3)

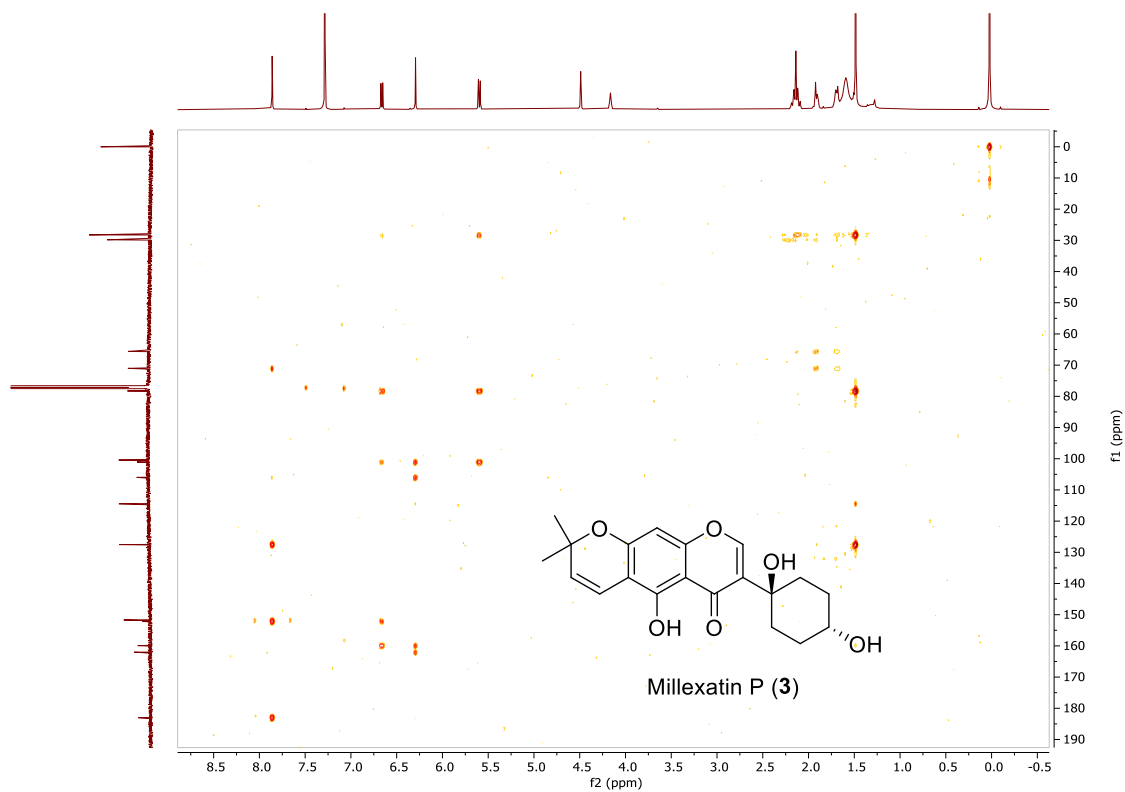

**Figure S22.** HMBC Spectrum of Millexatin P (3)

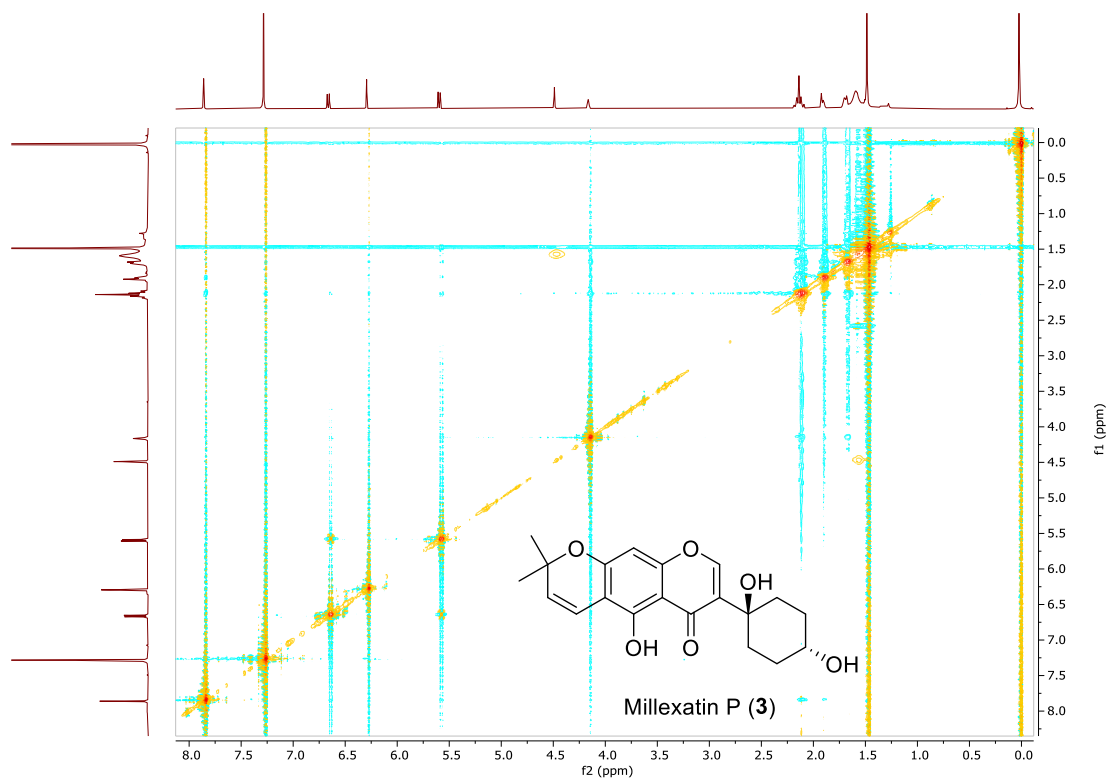

Figure S23. NOESY Spectrum of Millexatin P (3)

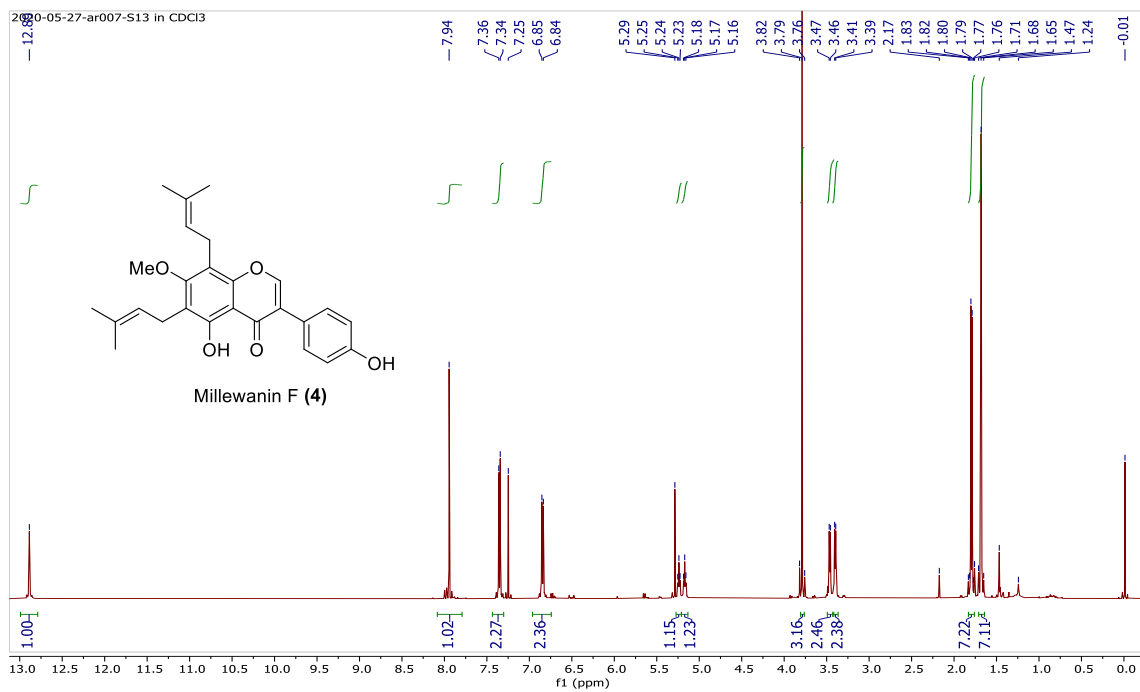

Figure S24. <sup>1</sup>H NMR (500 MHz) Spectrum of Millewanin F (4) in CDCl<sub>3</sub>



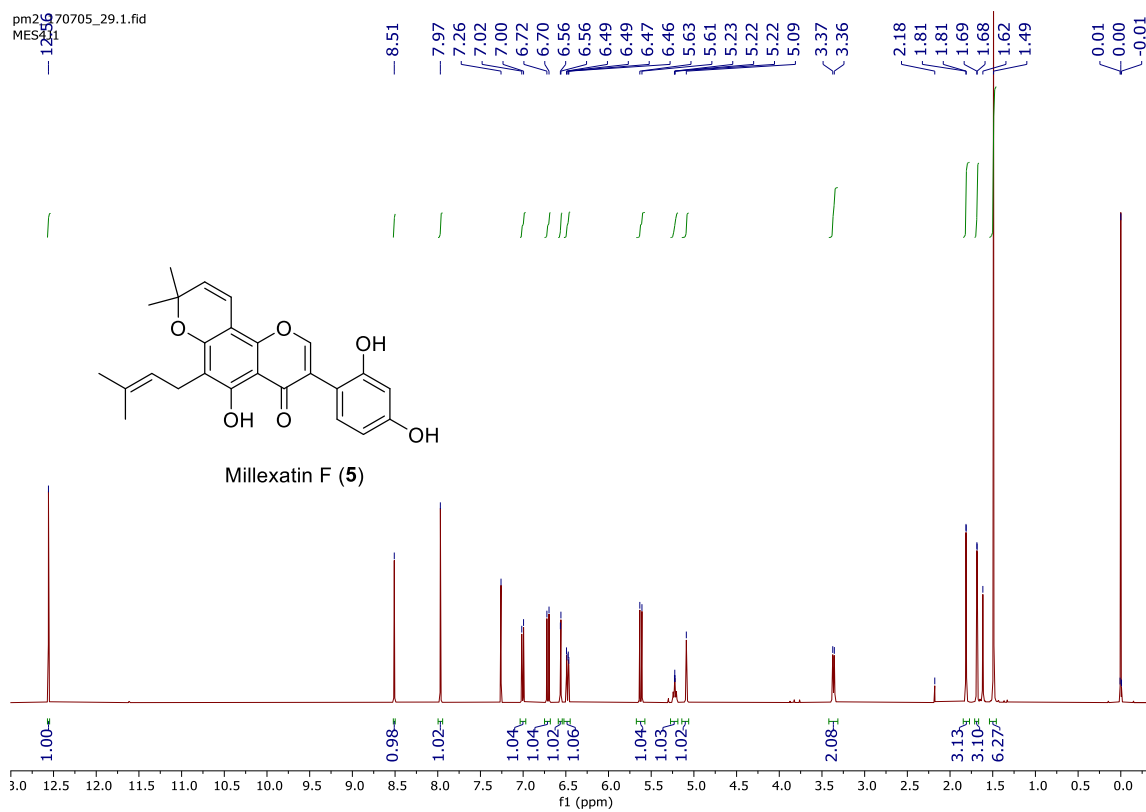

Figure S25.  $^1\text{H}$  NMR (500 MHz) Spectrum of Millexatin F (5) in  $\text{CDCl}_3$

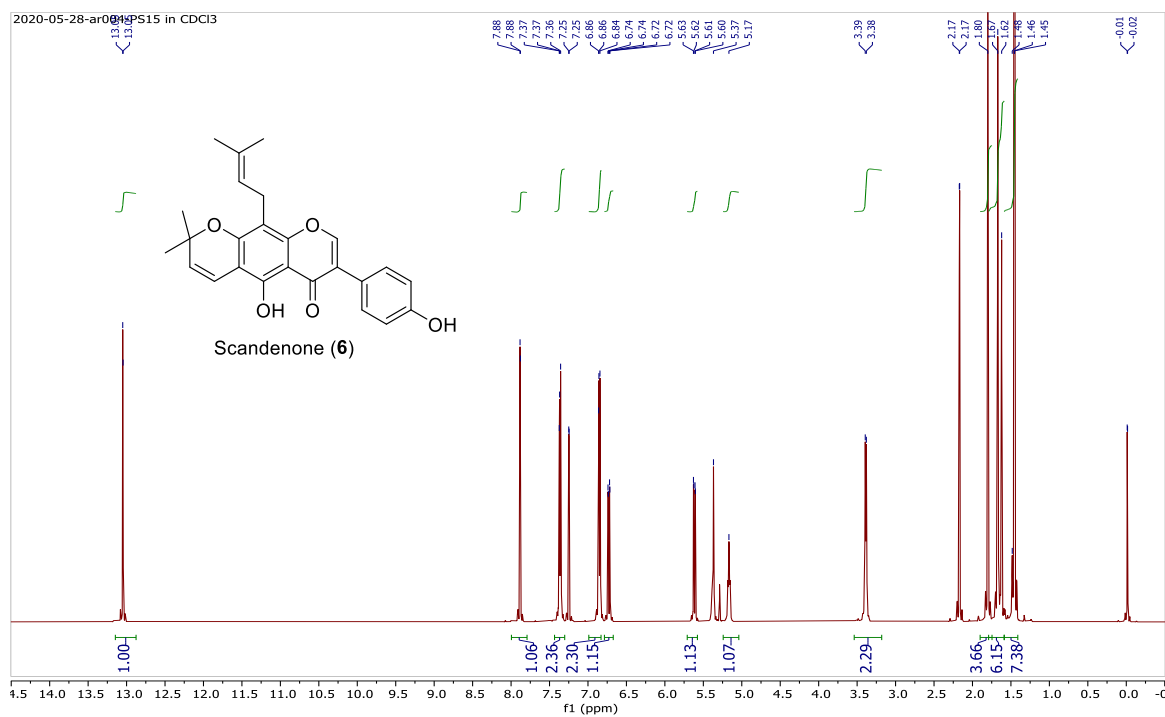

Figure S26.  $^1\text{H}$  NMR (500 MHz) Spectrum of Scandenone (6) in  $\text{CDCl}_3$

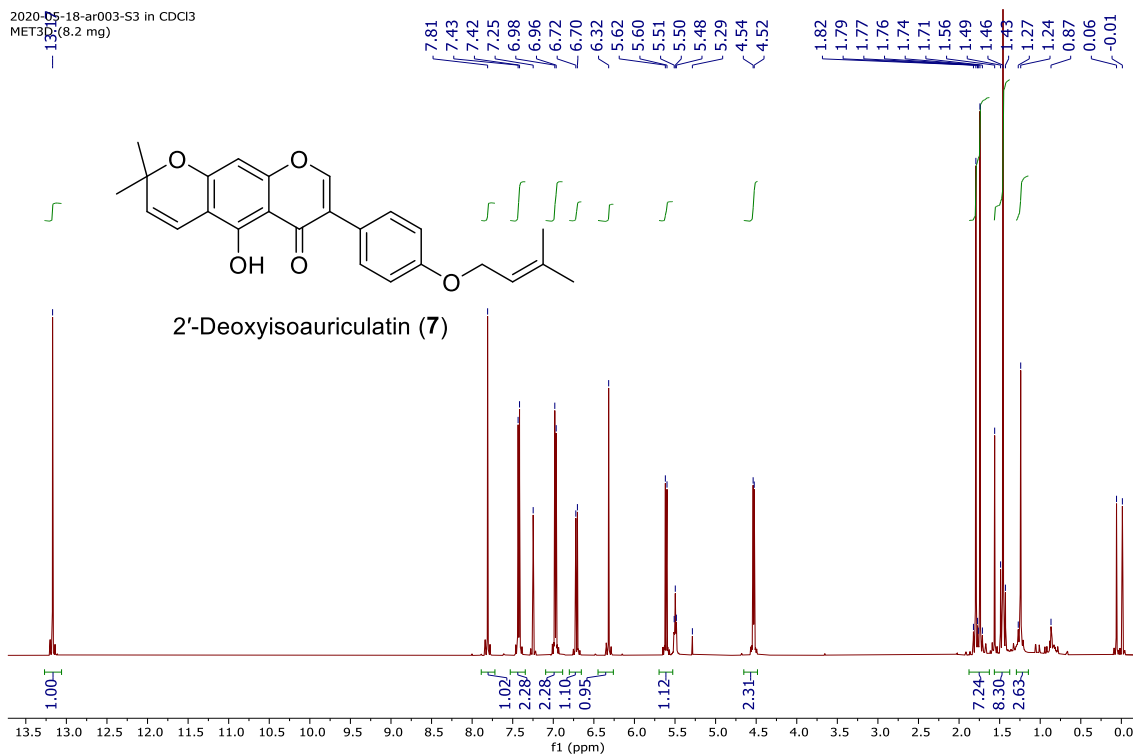

**Figure S27.** <sup>1</sup>H NMR (500 MHz) Spectrum of 2'-Deoxyisoauriculatin (7) in CDCl<sub>3</sub>

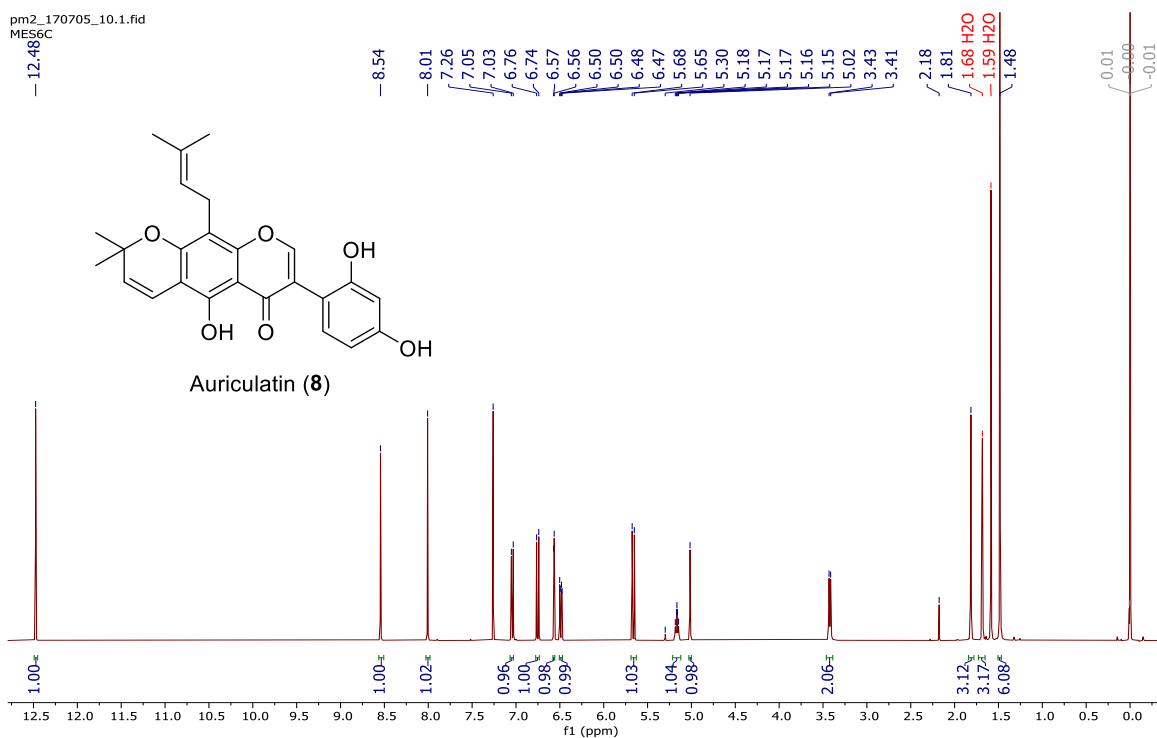

**Figure S28.** <sup>1</sup>H NMR (500 MHz) Spectrum of Auriculatin (8) in CDCl<sub>3</sub>

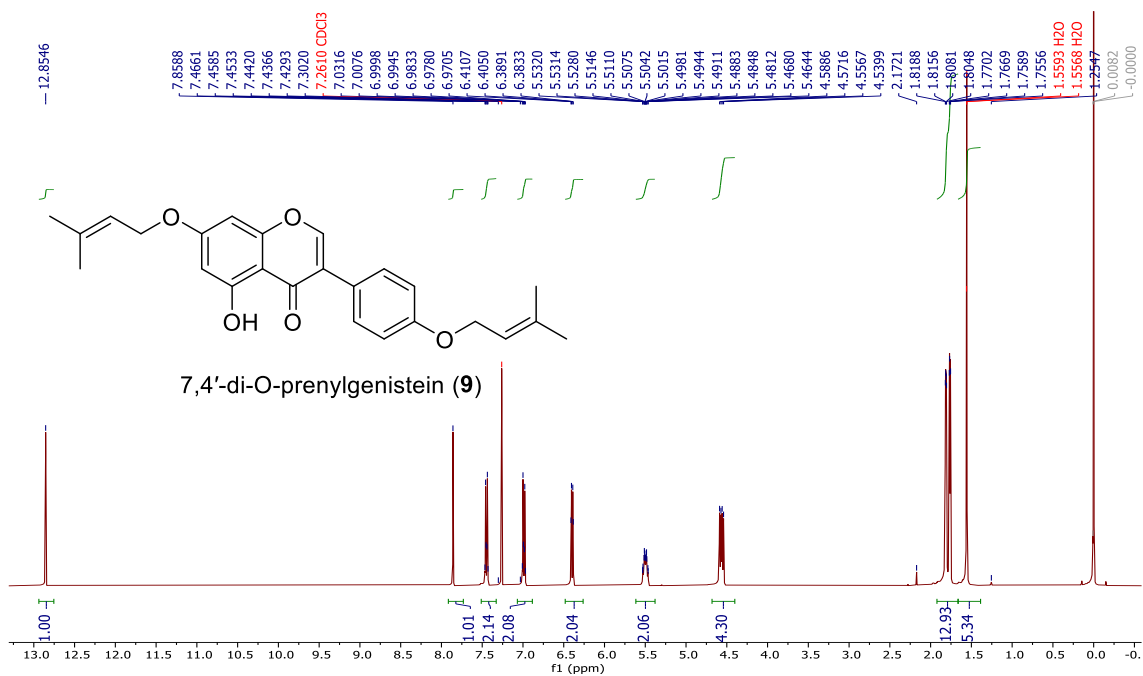

**Figure S29.**  $^1\text{H}$  NMR (500 MHz) Spectrum of 7,4'-di-O-prenylgenistein (9) in  $\text{CDCl}_3$

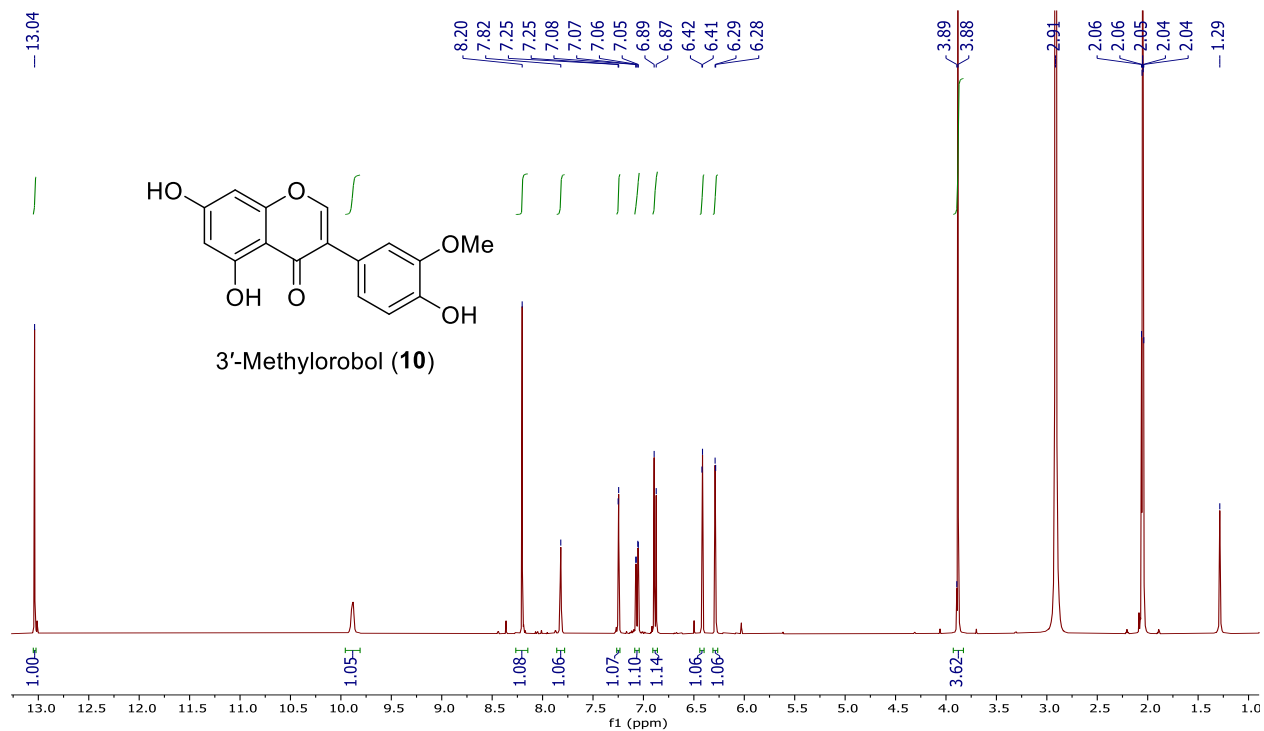

**Figure S30.**  $^1\text{H}$  NMR (500 MHz) Spectrum of 3'-Methylorobol (10) in  $\text{Acetone-}d_6$
